# Supplementary material
Source: MDPI journal article supplement (https://www.mdpi.com/2227-9040/11/8/435)
Supplement: s1 [file s1]

# NaBH<sub>4</sub>-Mediated Co-Reduction Synthesis of Glutathione Stabilized Gold/Silver Nanoclusters for Detection of Magnesium Ions

Weiwei Chen <sup>1</sup>, Yiying Chen <sup>1</sup>, Xianhu Zhu <sup>2</sup>, Miaomiao Xu <sup>1</sup>, Zhihao Han <sup>2</sup>, Lianhui Wang <sup>2</sup> and Lixing Weng <sup>1,\*</sup>

<sup>1</sup> School of Geographic and Biologic Information, Nanjing University of Posts and Telecommunications, Nanjing 210023, China; chenww@njupt.edu.cn (W.C.); 1021173611@njupt.edu.cn (Y.C.); xumiaomiao@njupt.edu.cn (M.X.)

<sup>2</sup> State Key Laboratory for Organic Electronics and Information Displays, Jiangsu Key Laboratory for Biosensors, Institute of Advanced Materials (IAM), Jiangsu National Synergetic Innovation Center for Advanced Materials (SICAM), Nanjing University of Posts & Telecommunications, Nanjing 210023, China; 1221066727@njupt.edu.cn (X.Z.); 17698067082@163.com (Z.H.); iamlhwang@njupt.edu.cn (L.W.)

\* Correspondence: lxweng@njupt.edu.cn

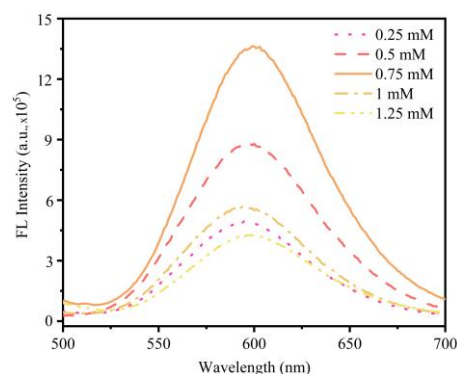

**Figure S1:** Optimization of NaBH<sub>4</sub> concentration for GSH@AuAg NCs preparation at 0.5 mM Au and Ag precursors, and 1.0 mM GSH.

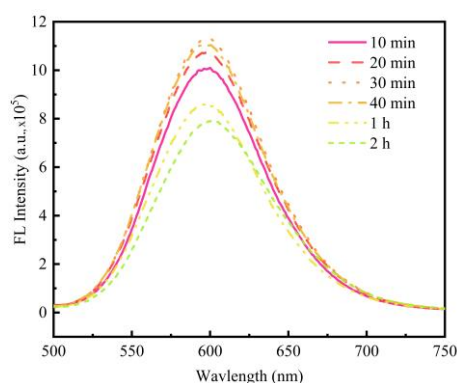

**Figure S2:** Fluorescent spectra of GSH@AuAg NCs obtained after mixing 0.5 mM Au and Ag precursors, 1.0 mM GSH and 0.75 mM NaBH<sub>4</sub> for different times.

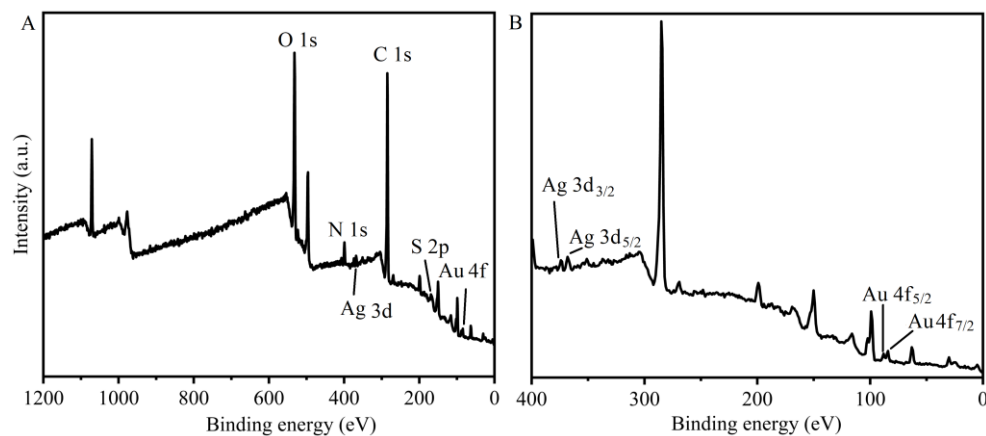

**Figure S3:** XPS spectra of AuAg NCs (A) Survey;(B) The particle dates of Au 4f and Ag 3d in survey spectrum.

**Table S1.** Detection of  $\text{Mg}^{2+}$  in purified drinking water samples ( $n=3$ ). The recovery measurements were done on samples spiked with different concentrations of  $\text{Mg}^{2+}$  to test the feasibility of the proposed method.

| Samples | Original<br>(nM) | Added<br>(nM) | Detected<br>(nM) | Recovery<br>(%) | RSD<br>(%) |
|---------|------------------|---------------|------------------|-----------------|------------|
| 1       | 0                | 300.0         | 292.3            | 97.4            | 3.1        |
| 2       | 0                | 600.0         | 577.5            | 96.2            | 5.1        |
| 3       | 0                | 900.0         | 852.3            | 97.4            | 6.1        |
